# Supplementary material for: An In-Depth Study on the Metabolite Profile and Biological Properties of Primula auriculata Extracts: A Fascinating Sparkle on the Way from Nature to Functional Applications
Source: MDPI journal article supplement (doi:10.3390/antiox11071377), 2022-07-15
Supplement: s1 [file s1]

# An in-depth study on the metabolite profile and biological properties of *Primula auriculata* extracts: a fascinating sparkle on the way from nature to functional applications

İnci Kurt-Celep<sup>1</sup>, Dimitrina Zheleva-Dimitrova<sup>2</sup>, Reneta Gevrenova<sup>2</sup>, Abdullahi Ibrahim Uba<sup>3</sup>, Gokhan Zengin<sup>4\*</sup>, Evren Yıldızıtugay<sup>5</sup>, Carene Marie Nancy Picot-Allain<sup>6</sup>, José Manuel Lorenzo<sup>7,8</sup>, Mohammad Fawzi Mahomoodally<sup>6</sup>, Domenico Montesano<sup>9\*</sup>

<sup>1</sup>Yeditepe University, Faculty of Pharmacy, Department of Pharmacognosy, 34755, Ataşehir, Istanbul, Turkey, [incikurt00@gmail.com](mailto:incikurt00@gmail.com) (I.K.C)

<sup>2</sup>Department of Pharmacognosy, Faculty of Pharmacy, Medical University-Sofia, Sofia, Bulgaria, [dimizheleva@gmail.com](mailto:dimizheleva@gmail.com) (D.Z); [rgevrenova@gmail.com](mailto:rgevrenova@gmail.com) (R.G)

<sup>3</sup>Department of Molecular Biology and Genetics, Faculty of Engineering and Natural Sciences, Kadir Has University, Istanbul 34083, Turkey, [abdullahi.iu2@gmail.com](mailto:abdullahi.iu2@gmail.com) (A.I.U)

<sup>4</sup>Physiology and Biochemistry Research Laboratory, Department of Biology, Science Faculty, Selcuk University, Campus, 42130, Konya, Turkey, [gokhanzengin@selcuk.edu.tr](mailto:gokhanzengin@selcuk.edu.tr) (G.Z)

<sup>5</sup>Department of Biotechnology, Science Faculty, Selcuk University, Campus, Konya, Turkey, [eytugay@gmail.com](mailto:eytugay@gmail.com) (E.Y)

<sup>6</sup>Department of Health Sciences, Faculty of Medicine and Health Sciences, University of Mauritius, Réduit, Mauritius, [picotcarene@gmail.com](mailto:picotcarene@gmail.com) (C.M..N.P); [f.mahomoodally@uom.ac.mu](mailto:f.mahomoodally@uom.ac.mu) (M.F.M)

<sup>7</sup>Centro Tecnológico de la Carne de Galicia, Rúa Galicia N° 4, Parque Tecnológico de Galicia, San Cibrao das Viñas, 32900 Ourense, Spain, [jmlorenzo@ceteca.net](mailto:jmlorenzo@ceteca.net) (J.M.L)

<sup>8</sup>Universidade de Vigo, Área de Tecnoloxía dos Alimentos, Facultade de Ciencias, 32004 Ourense, Spain

<sup>9</sup>Department of Pharmacy, University of Naples Federico II, via D. Montesano 49, 80131 Naples, Italy, [domenico.montesano@unina.it](mailto:domenico.montesano@unina.it) (D.M)

\* Correspondence: [gokhanzengin@selcuk.edu.tr](mailto:gokhanzengin@selcuk.edu.tr) (Dr. Gokhan ZENGİN); [domenico.montesano@unina.it](mailto:domenico.montesano@unina.it) (Dr. Domenico Montesano)

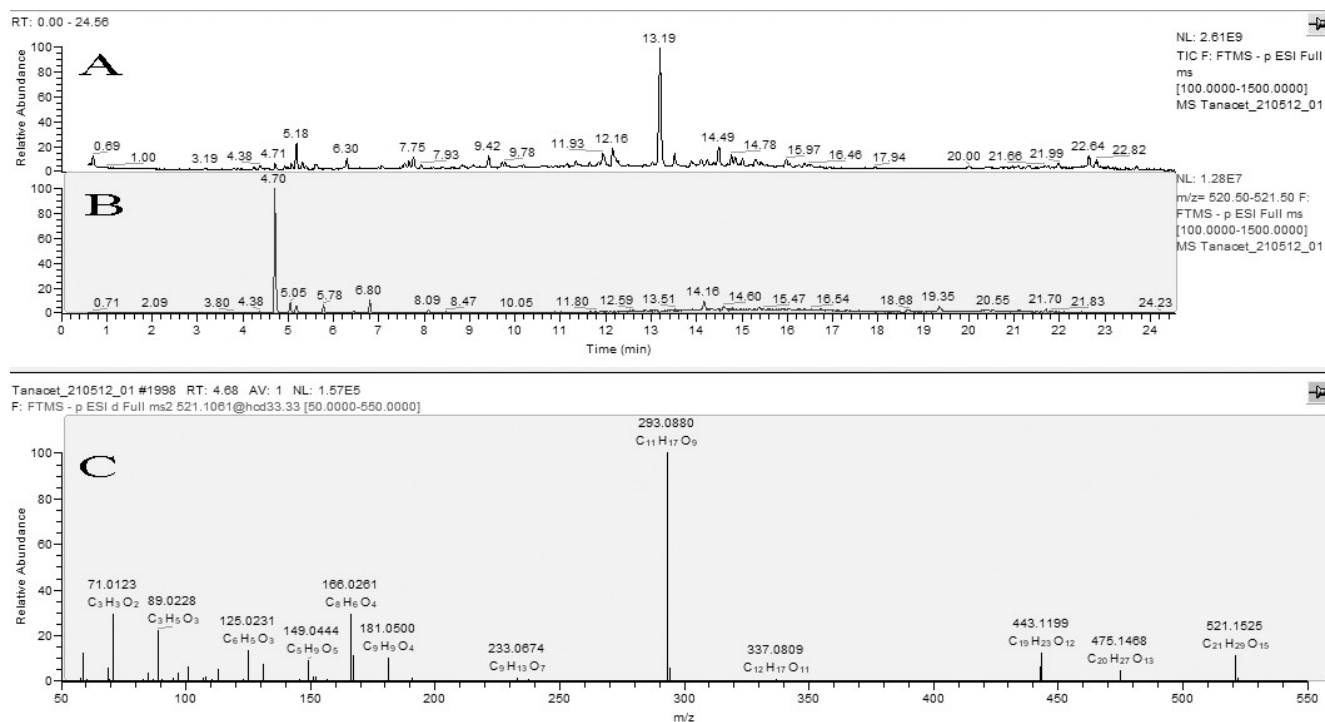

Figure S1. Total ion chromatogram of *P. auriculata* aerial parts ethyl acetate extract in negative ion mode (A), extracted ion chromatogram of compound 5 at  $m/z$  475.1468 (B), and MS/MS fragmentation of compound 5 (C)

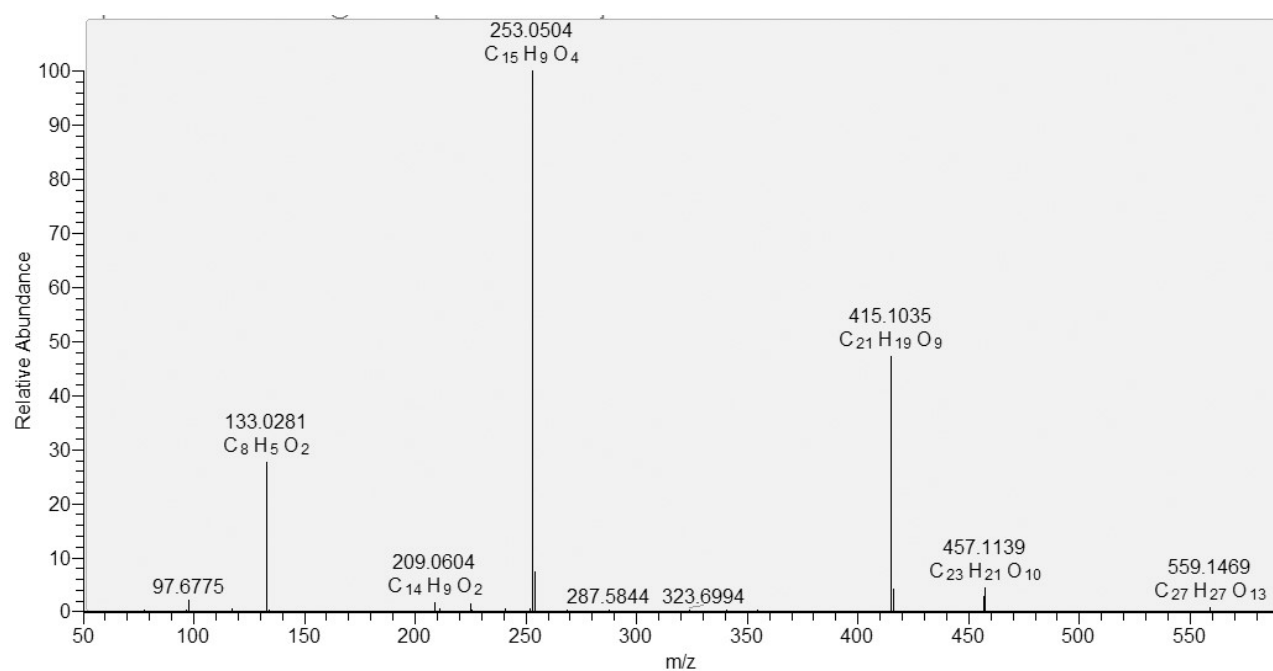

Figure S2. MS/MS spectrum of compound 32 at  $m/z$  559.145

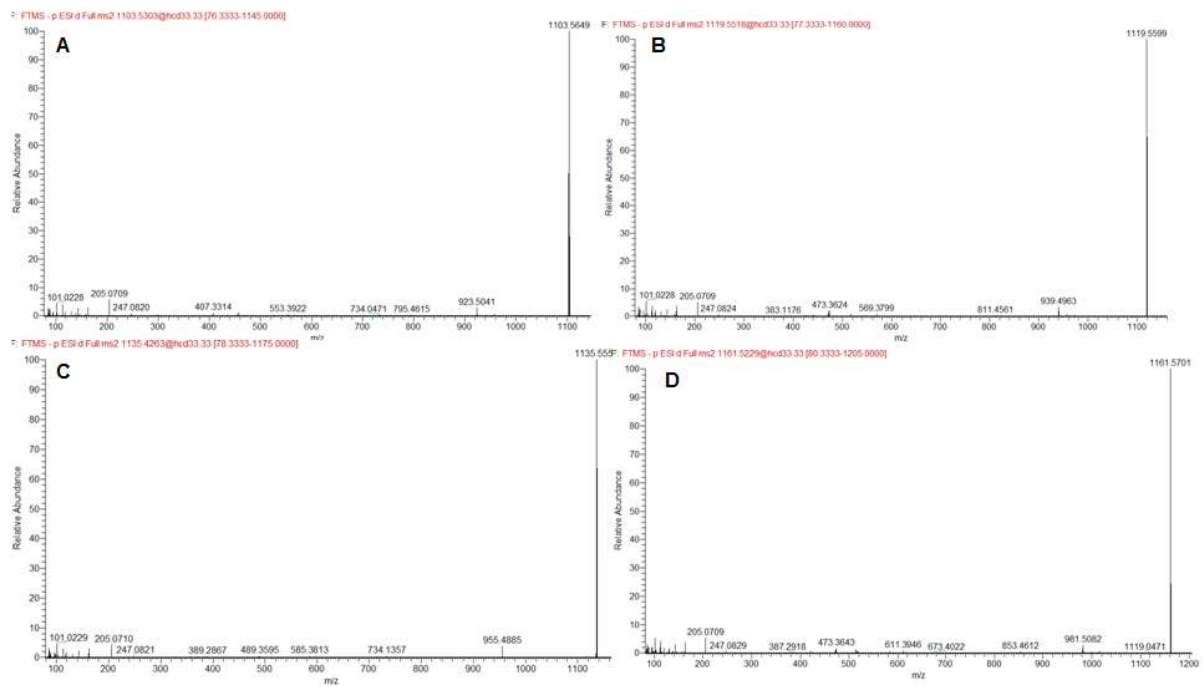

Figure S3. MS/MS spectra of *Primula auriculata* saponins at  $m/z$  1103.565 (A); 1119.559 (B); 1135.555 (C); 1161.570 (D).

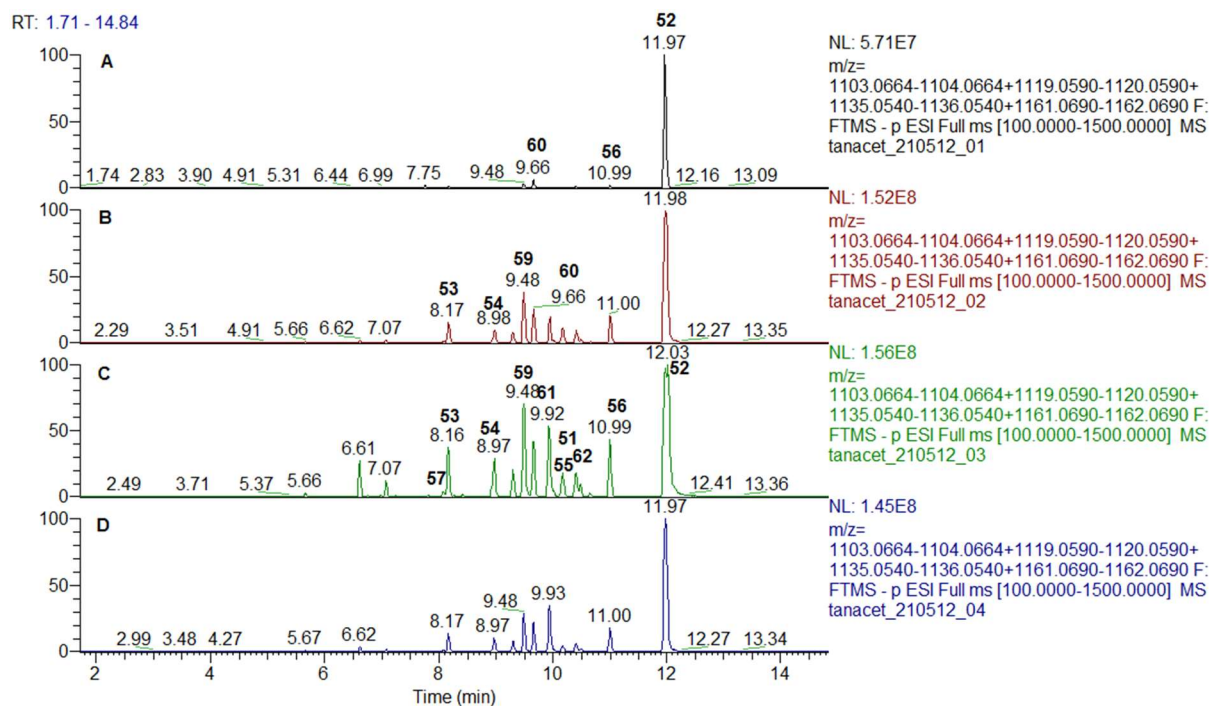

Figure S4. Extracted ion chromatograms of the assayed saponins in *Primula auriculata* aerial parts: ethylacetate extract (A); ethanol extract (B); ethanol/water extract (C); infusion extract (D)

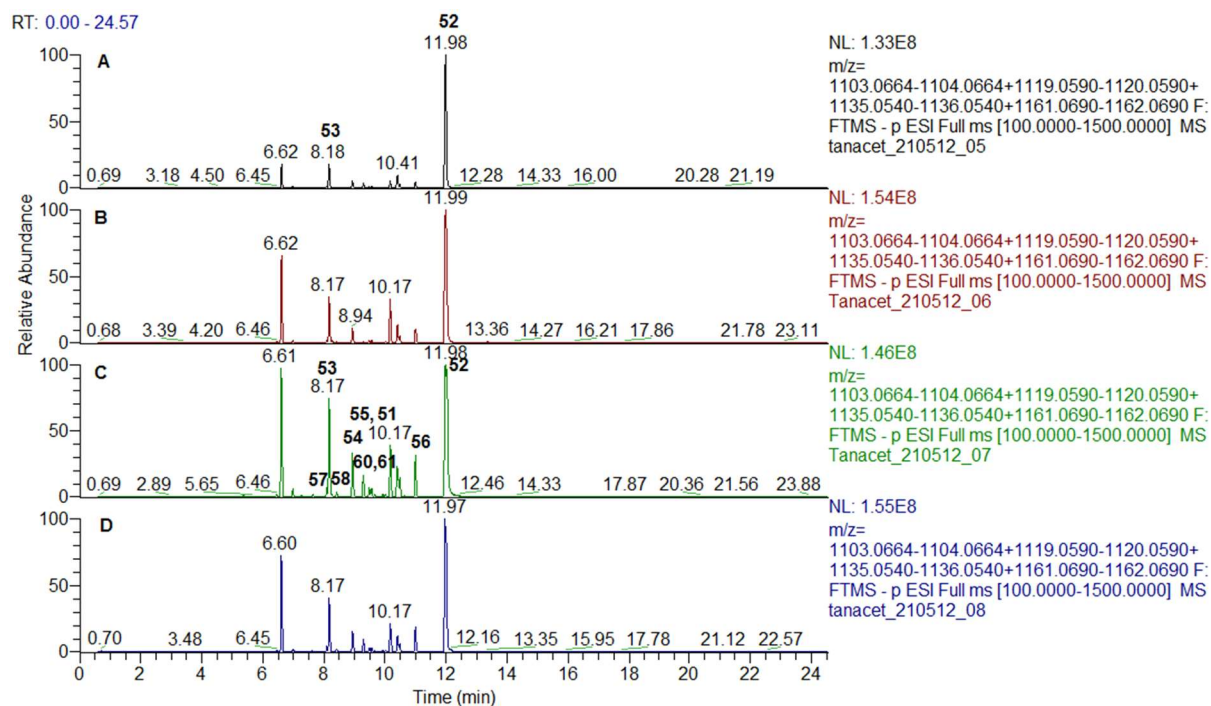

Figure S5. Extracted ion chromatograms of the assayed saponins in *Primula auriculata* roots: ethylacetate extract (A); ethanol extract (B); ethanol/water extract (C); infusion extract (D)
